# Supplementary material for: Strigolactone Regulates Anthocyanin Accumulation, Acid Phosphatases Production and Plant Growth under Low Phosphate Condition in Arabidopsis
Source: PubMed Central journal article supplement (PMC4368578; doi:10.1371/journal.pone.0119724), 2015-03-20
Supplement: pone.0119724.s001.pdf [file pone.0119724.s001.pdf]

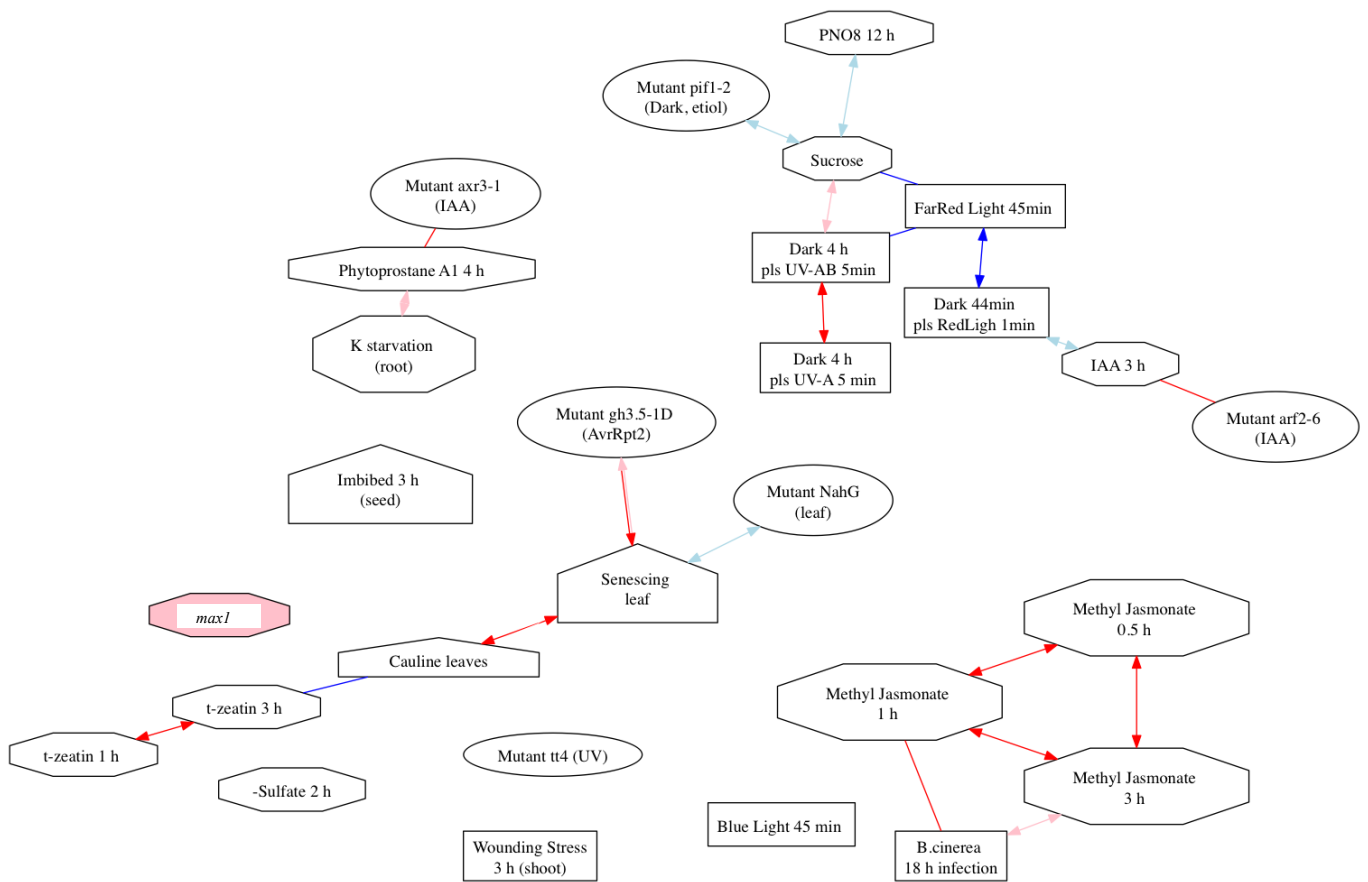

S1 Figure. Correlation analysis of gene expression experiments (RNAseq or DNA microarray) using AtCAST. Experiments showing a significant correlation (Spearman's correlation coefficient (SCC) > 0.3) with "*max1-1 (max1-1 mutants compared with wild-type)*" were searched. Red arrows indicate strong positive relationships (SCCs > 0.7); blue arrows indicate strong negative relationships (SCCs < -0.65); pink arrows, moderate relationships (SCCs > 0.5); and light blue arrows indicate moderately negative relationships (SCCs < -0.5). Arrowhead directions indicate whether the interactions were uni- or bidirectional.
